# Supplementary material
Source: Springer Nature journal article supplement (https://www.springermedizin.de/resource/supplementary/12950_2012_349_MOESM2_ESM.pdf/9557680)

**A**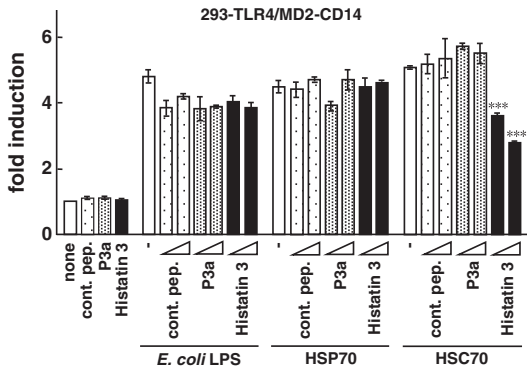**B**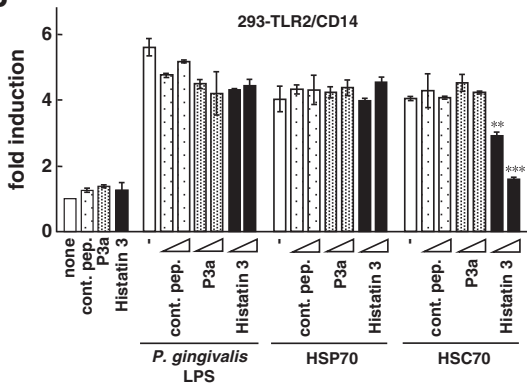**C**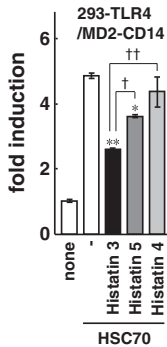**D**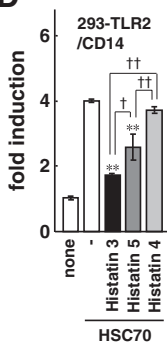

Supplement: MOESM2 [file 9557680]
